# Supplementary material for: Synthesis and evaluation of hybrid molecules targeting the vinca domain of tubulin
Source: Royal Society of Chemistry journal article supplement (doi:10.1039/c4ob02114b), 2015-01-01

Supplementary Material for

**Synthesis and evaluation of hybrid molecules targeting  
the vinca domain of tubulin**

O. Gherbovet,<sup>a</sup> Pedro A. Sánchez-Murcia,<sup>b</sup> M. C. García Alvarez,<sup>a</sup> J.  
Bignon,<sup>a</sup> S. Thoret,<sup>a</sup> F. Gago<sup>b</sup> and F. Roussi,<sup>a,\*</sup>

<sup>a</sup> *Centre de Recherche de Gif, Institut de Chimie des Substances Naturelles, UPR 2301 du CNRS, Avenue de la Terrasse, 91198, Gif-sur-Yvette Cedex, France.*

<sup>b</sup> *Departamento de Farmacología, Universidad de Alcalá, 28871 Alcalá de Henares, Madrid, Spain*

\* Corresponding Author Email Address: [fanny.roussi@cnrs.fr](mailto:fanny.roussi@cnrs.fr)

|                                                                  |    |
|------------------------------------------------------------------|----|
| Additional data of molecular modelling experiments               | S2 |
| <sup>1</sup> H and <sup>13</sup> C spectra for all new compounds | S6 |

(a)

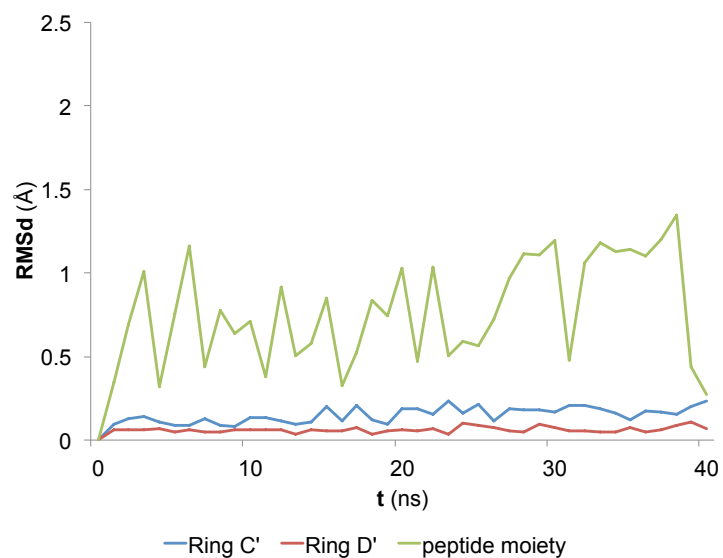

(b)

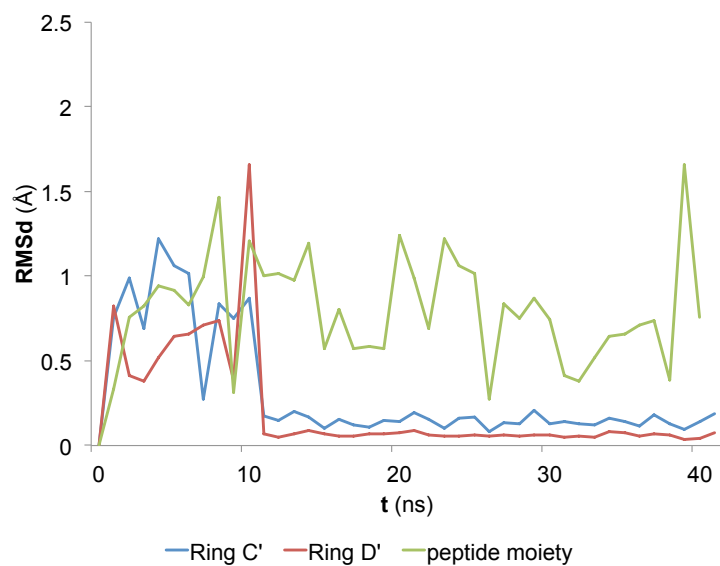

**Figure S1.** Time evolution of the root-mean-square deviation (RMSd, Å) of **25** (a) and **22** (b) along the unrestrained MD simulation in a box of explicit solvent at 300 K.

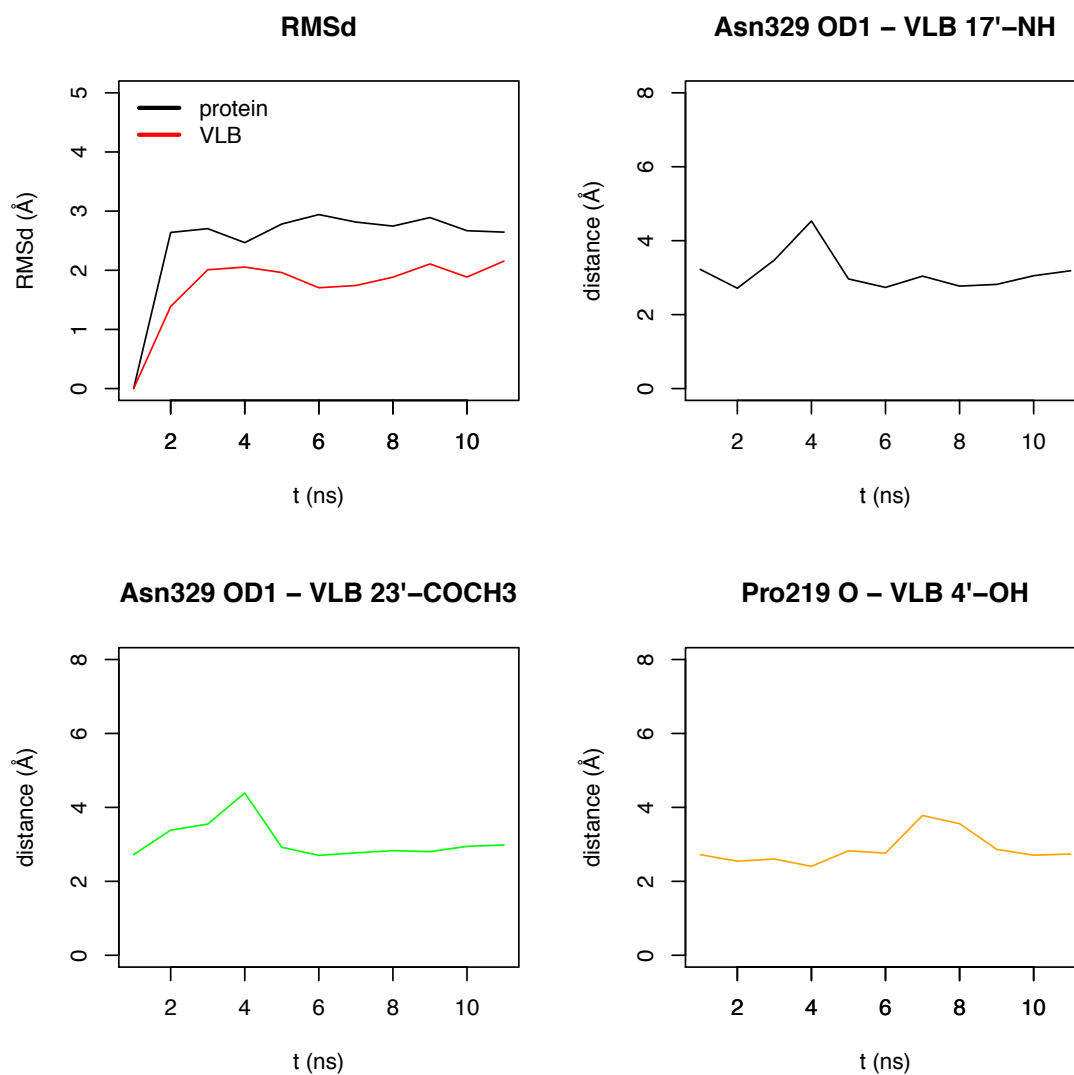

**Figure S2.** Time evolution of the root-mean-square deviation (RMSd, Å) and key distances (Å) corresponding to the main interactions observed for **1** within the vinca-binding domain along the unrestrained MD simulation in a box of explicit solvent at 300 K.

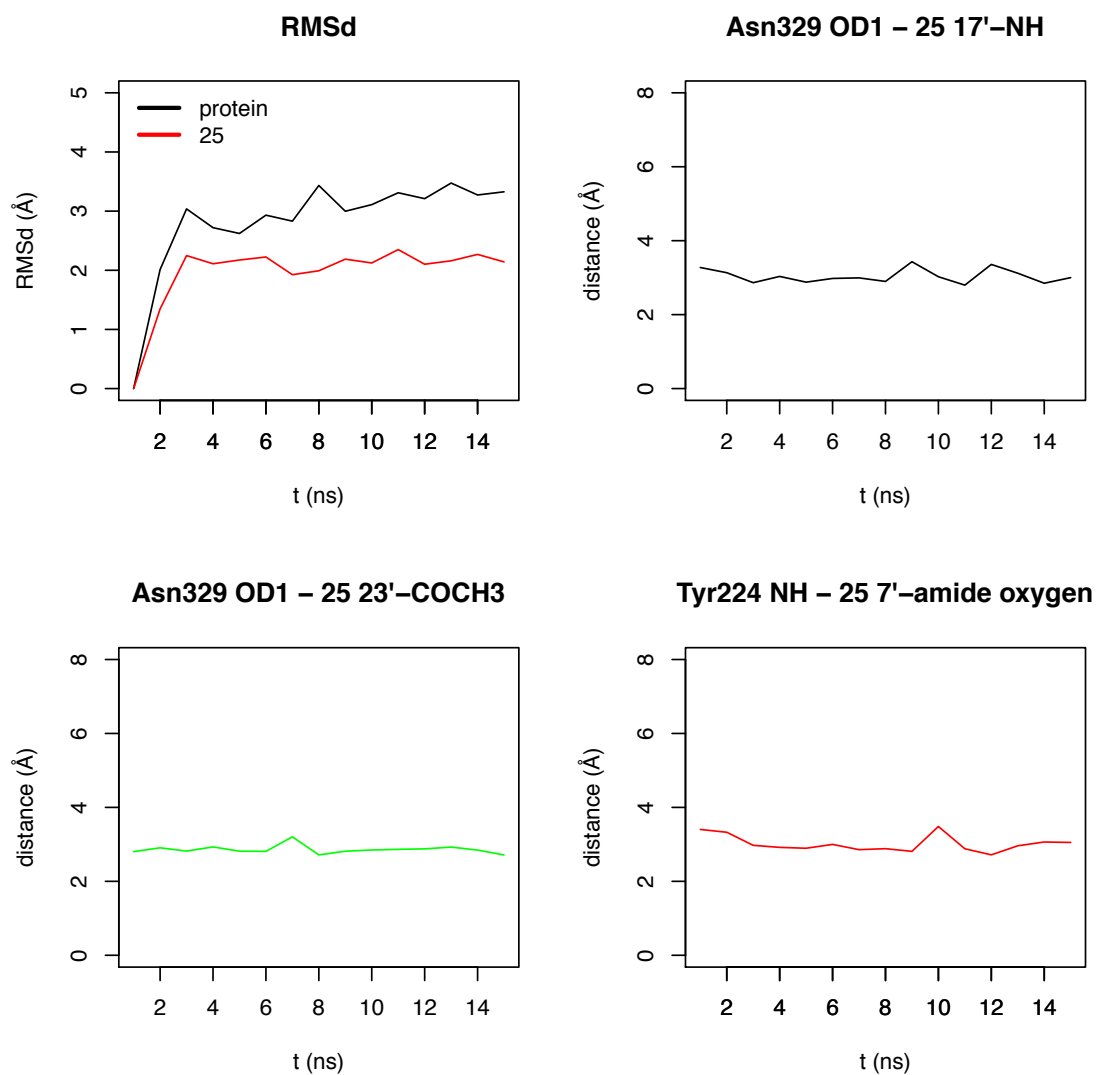

**Figure S3.** Time evolution of the root-mean-square deviation (RMSd, Å) and key distances (Å) corresponding to the main interactions observed for **25** within the vinca-binding domain along the unrestrained MD simulation in a box of explicit solvent at 300 K.

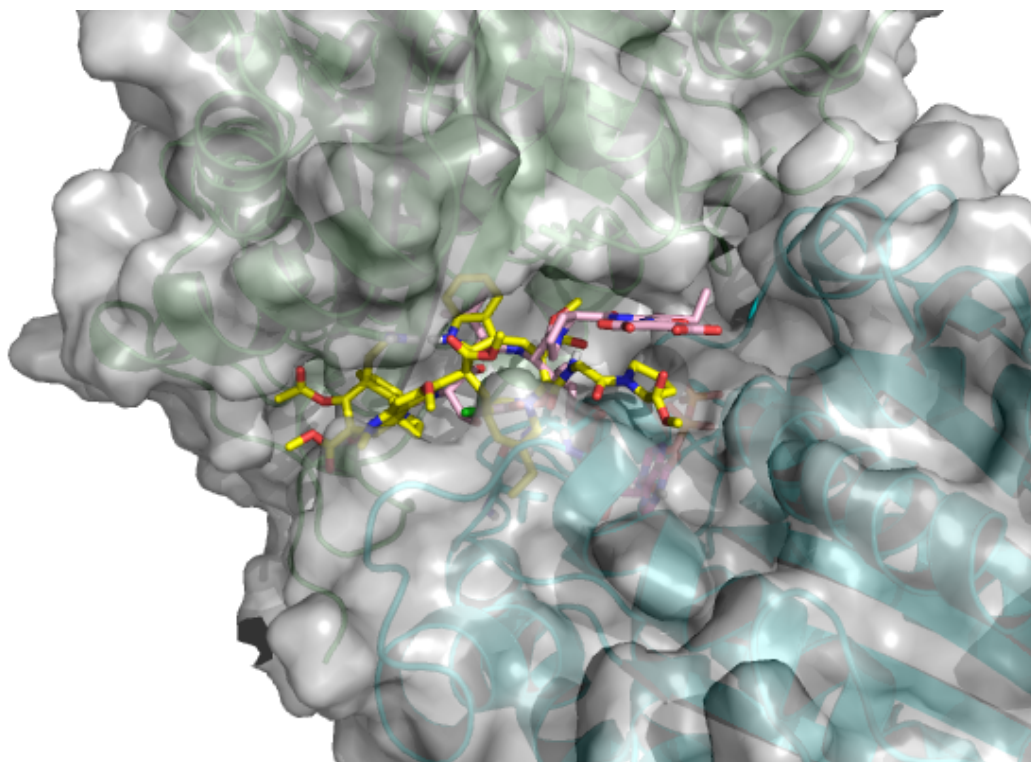

**Figure S4.** View of the inter-dimer interface showing bound **25** (sticks, C atoms in yellow) in a representative conformation and overlaid **4** (sticks, C atoms in pink) for reference after a best-fit superposition of the protein, which appears enveloped within a semitransparent surface. Cartoon representations of  $\beta_1$ - and  $\alpha_2$ -tubulin are coloured cyan and green, respectively.

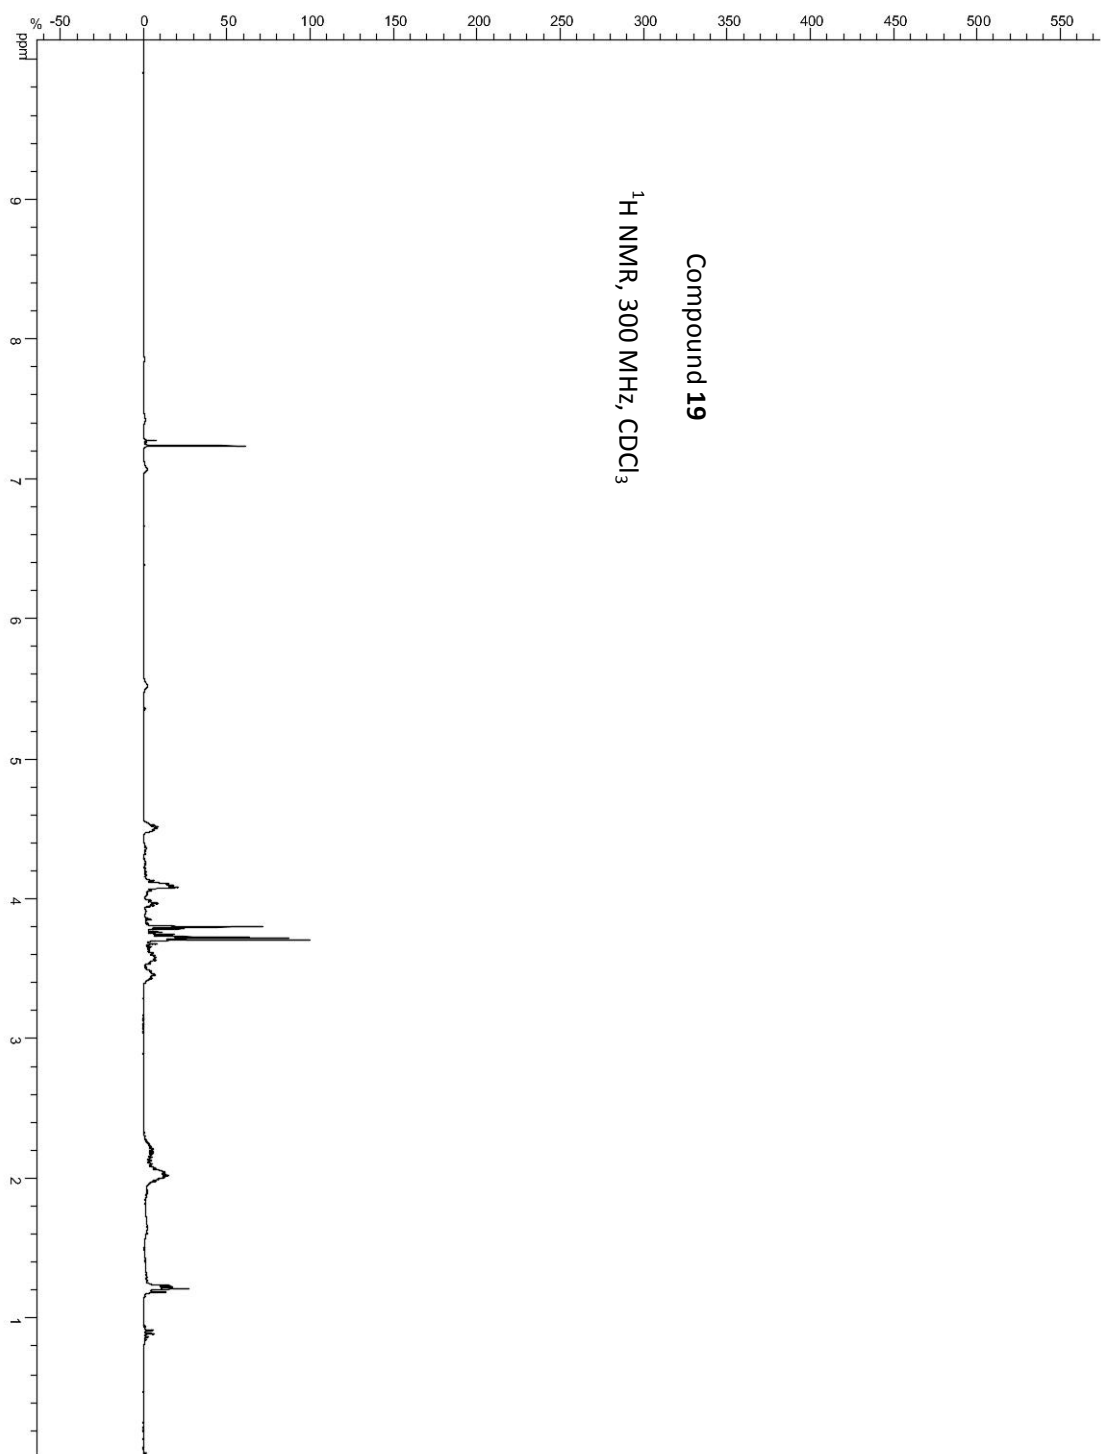

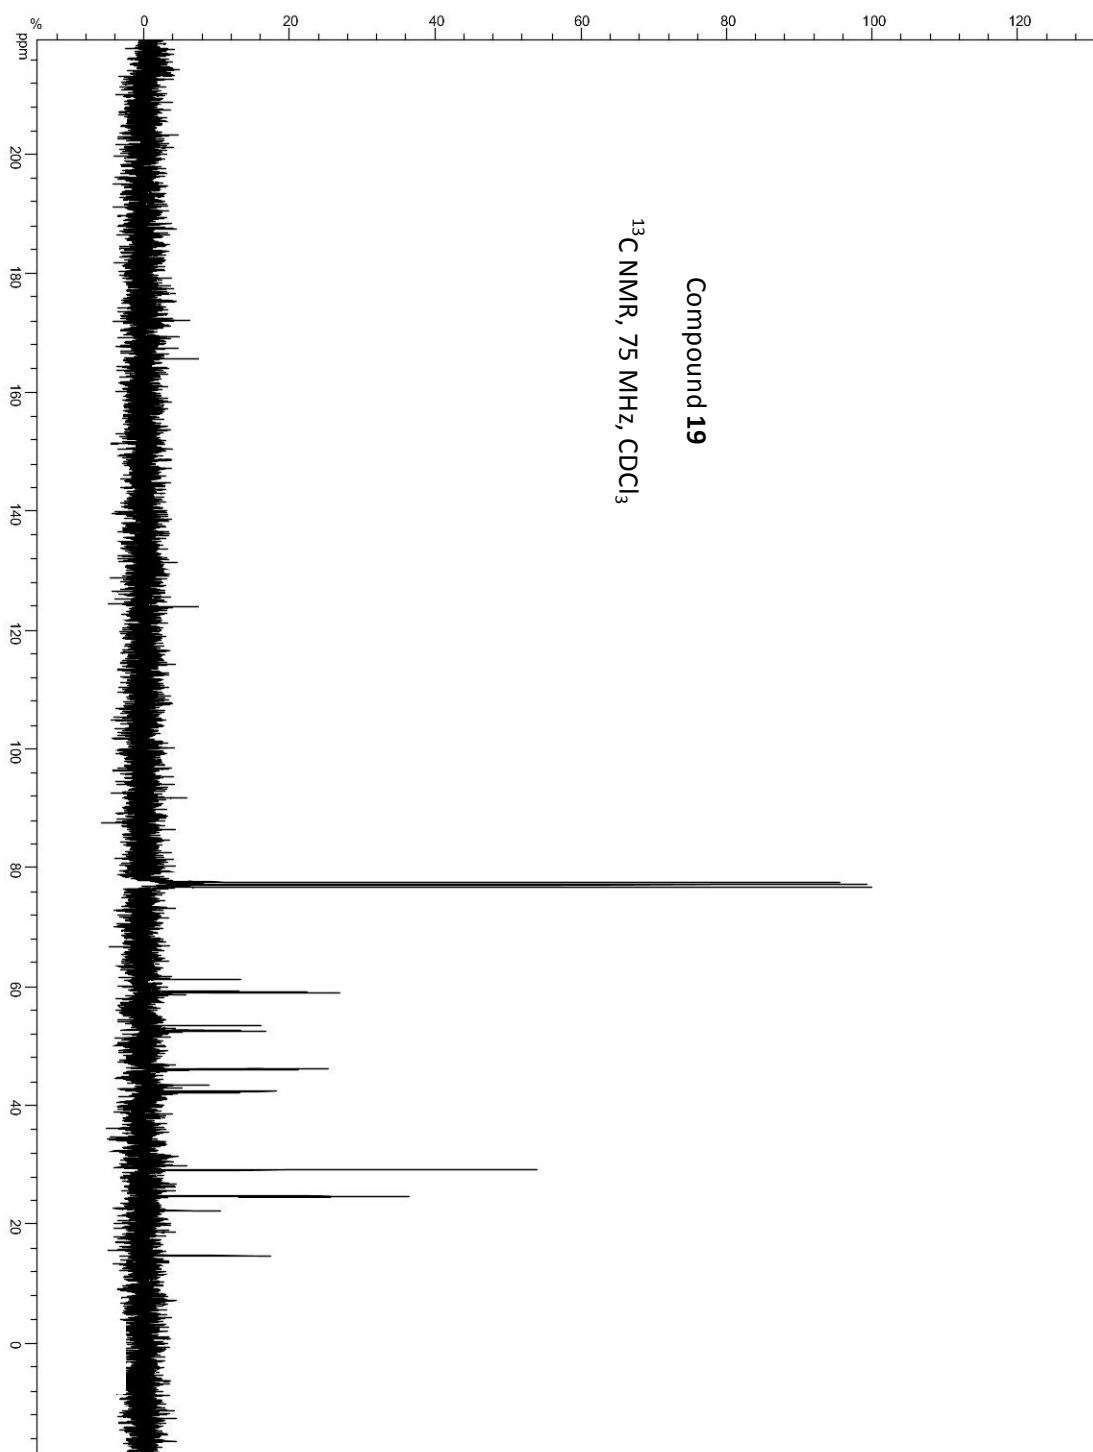

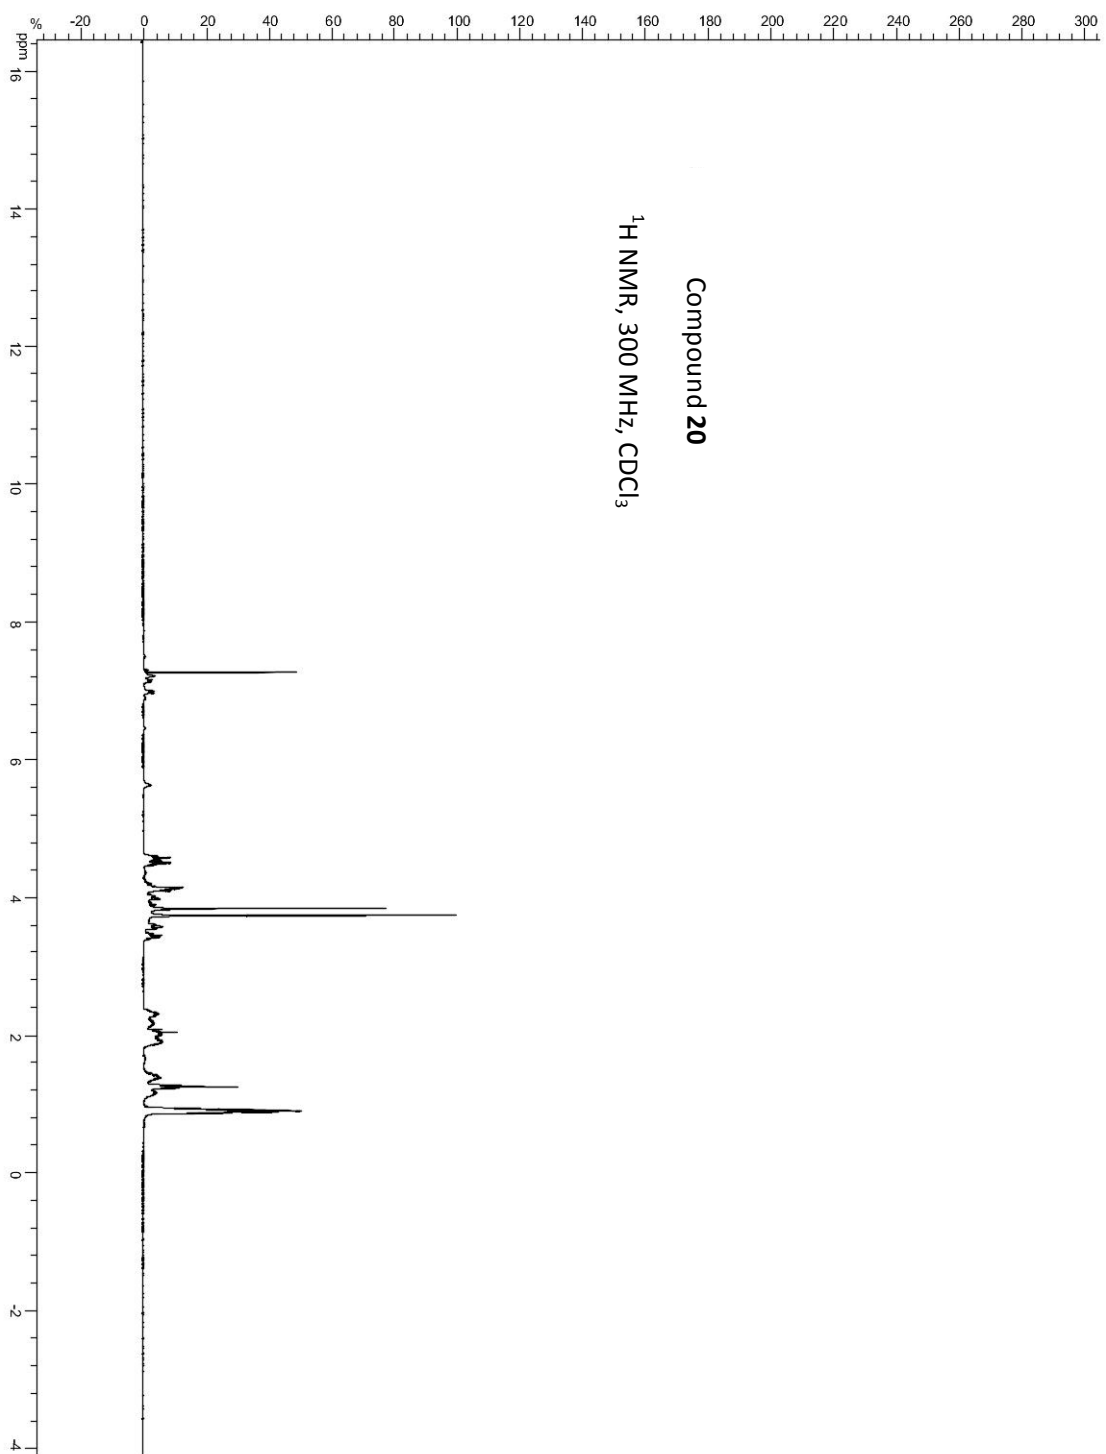



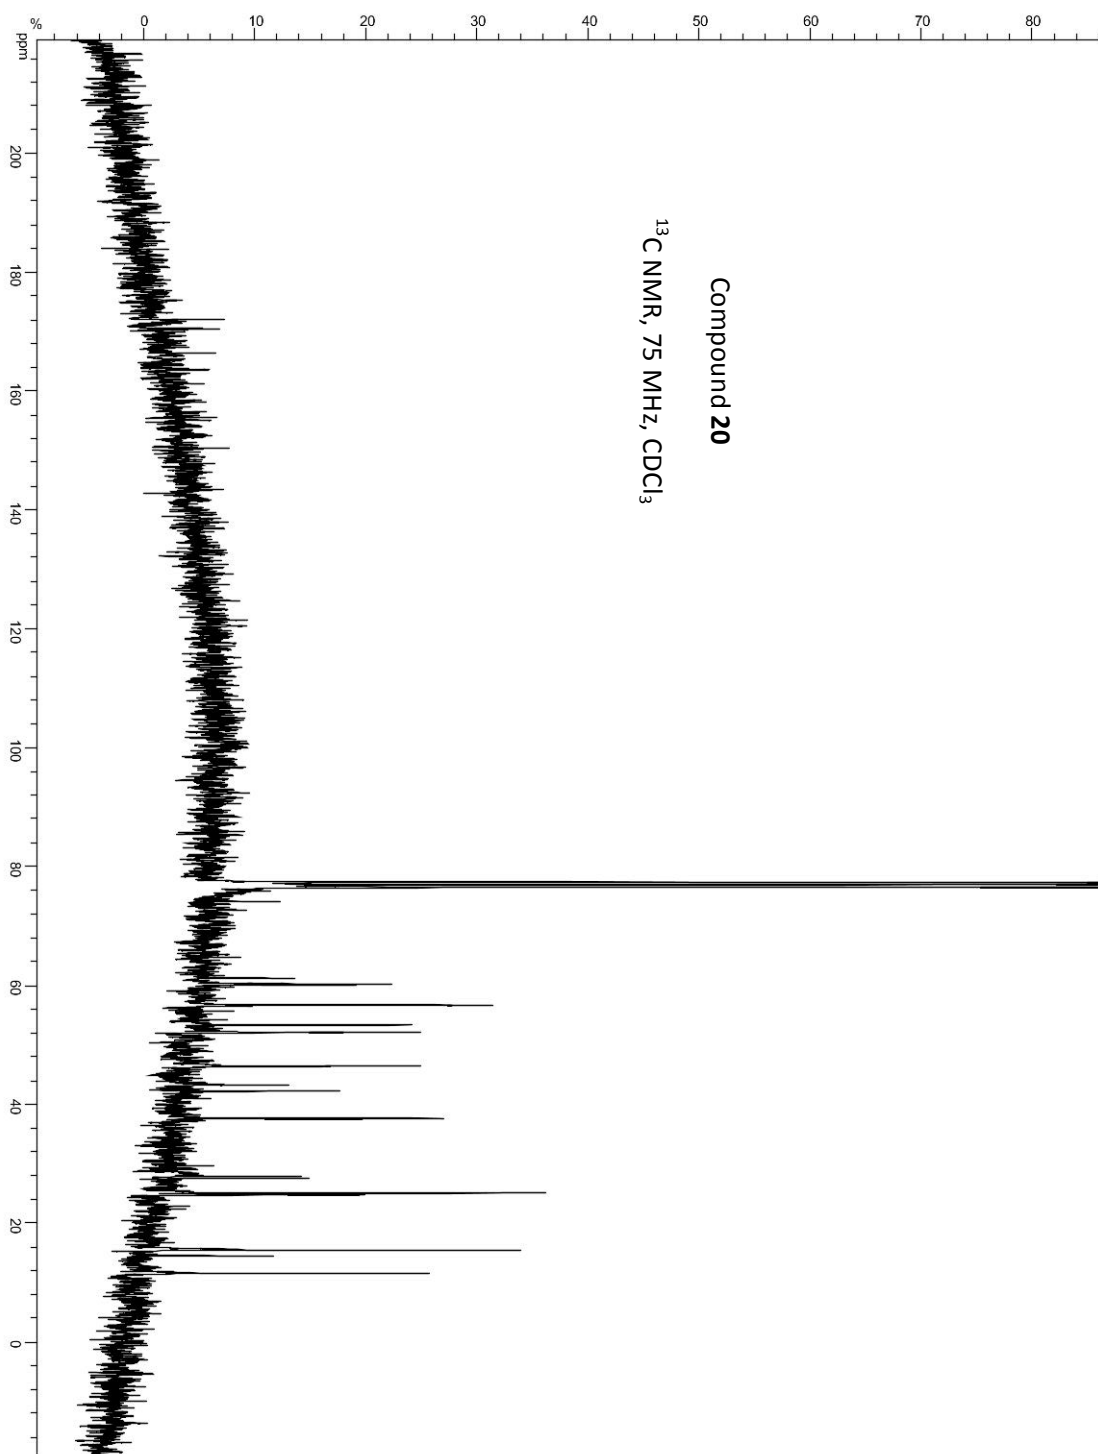

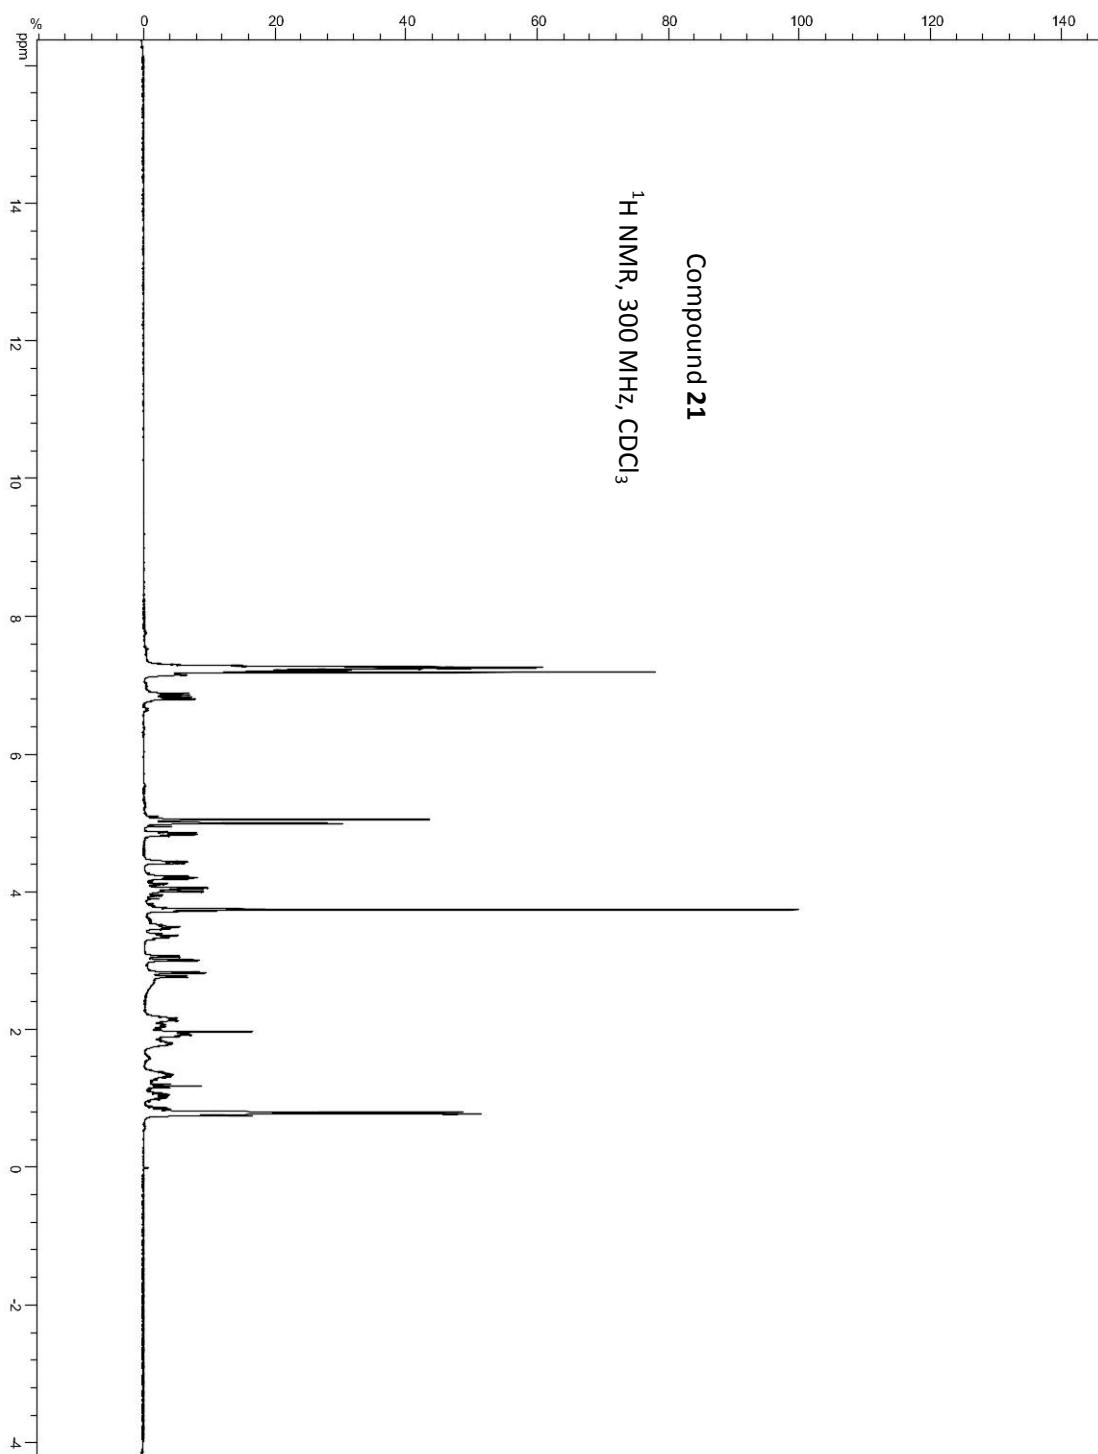

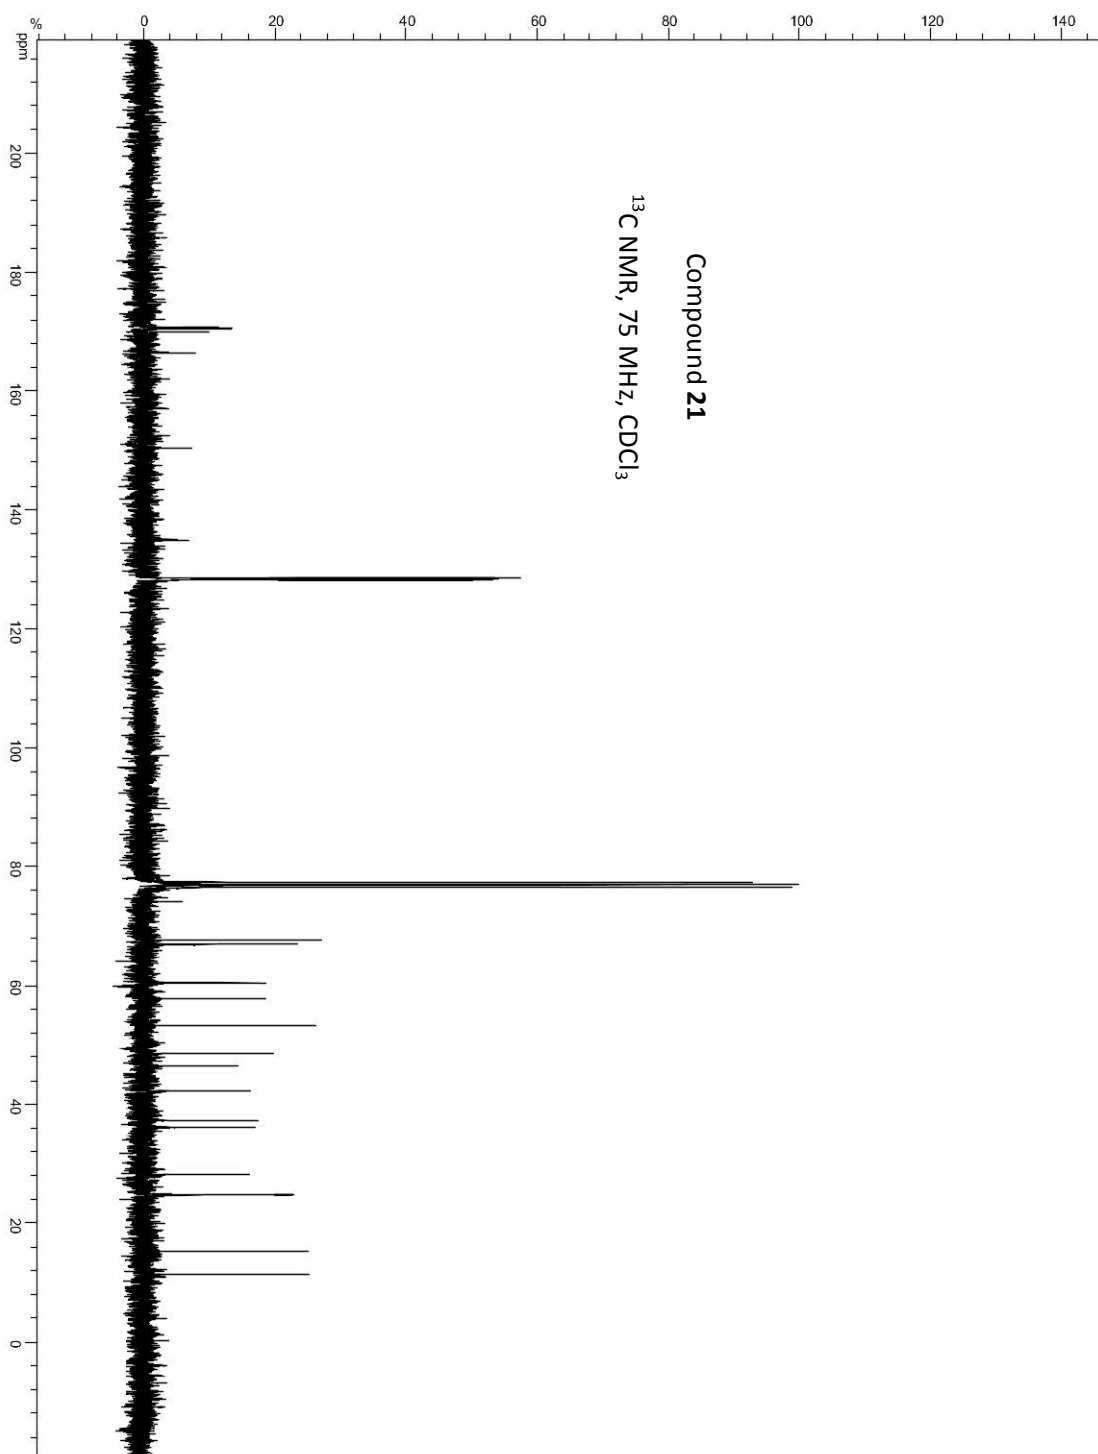

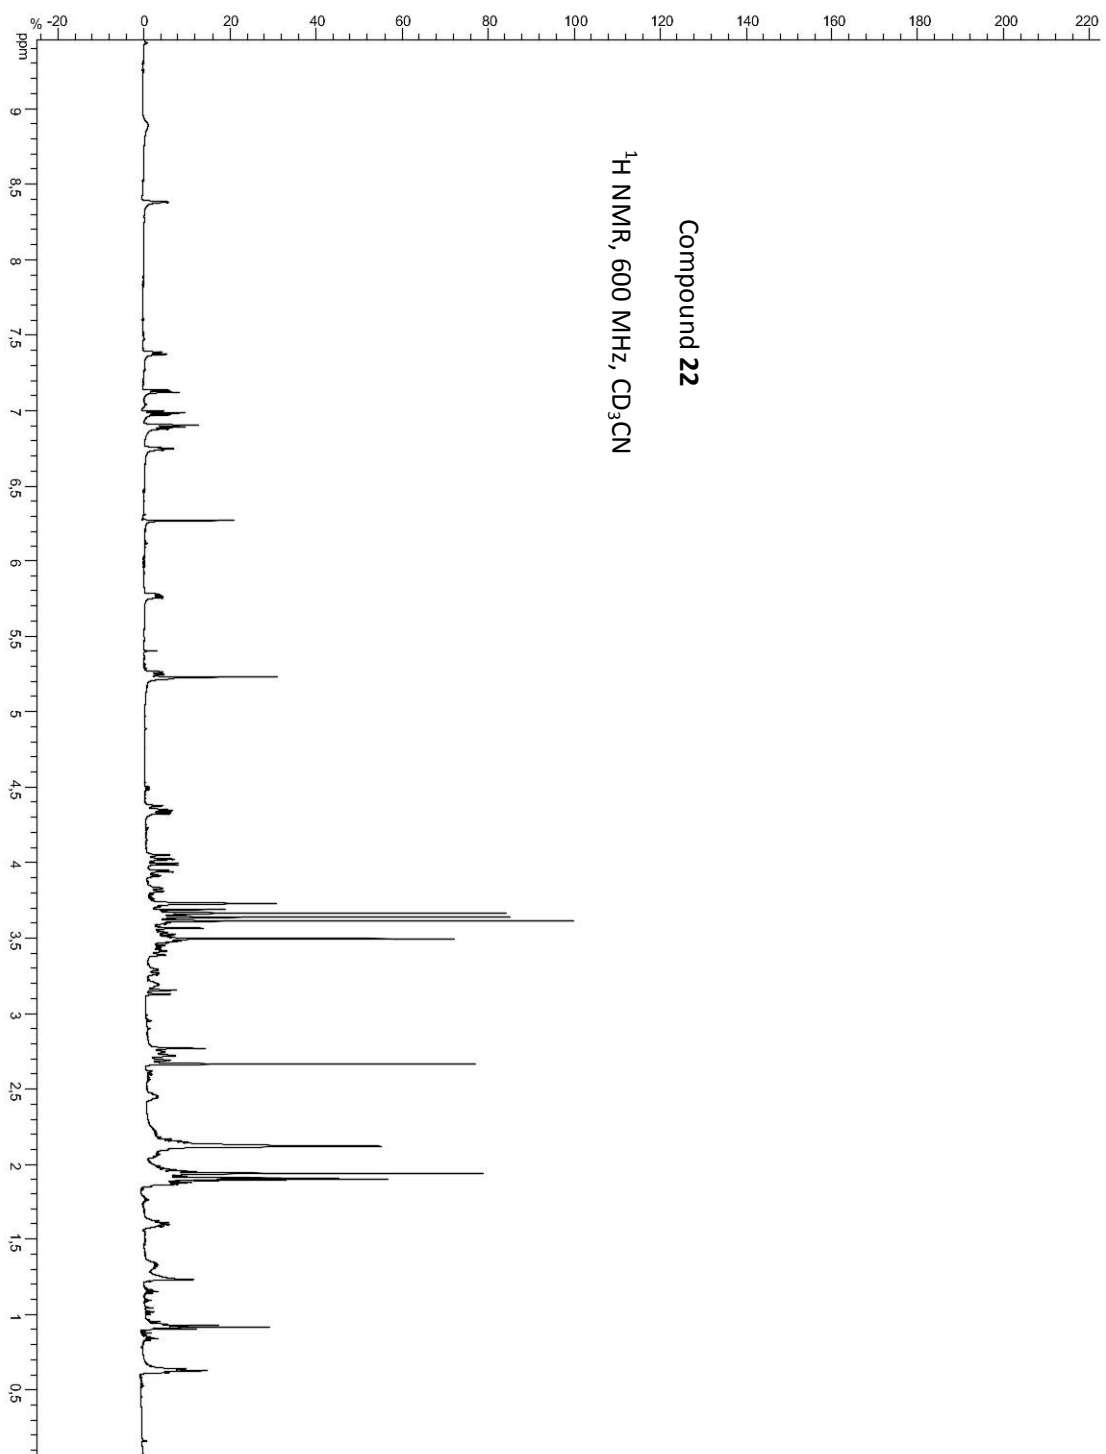

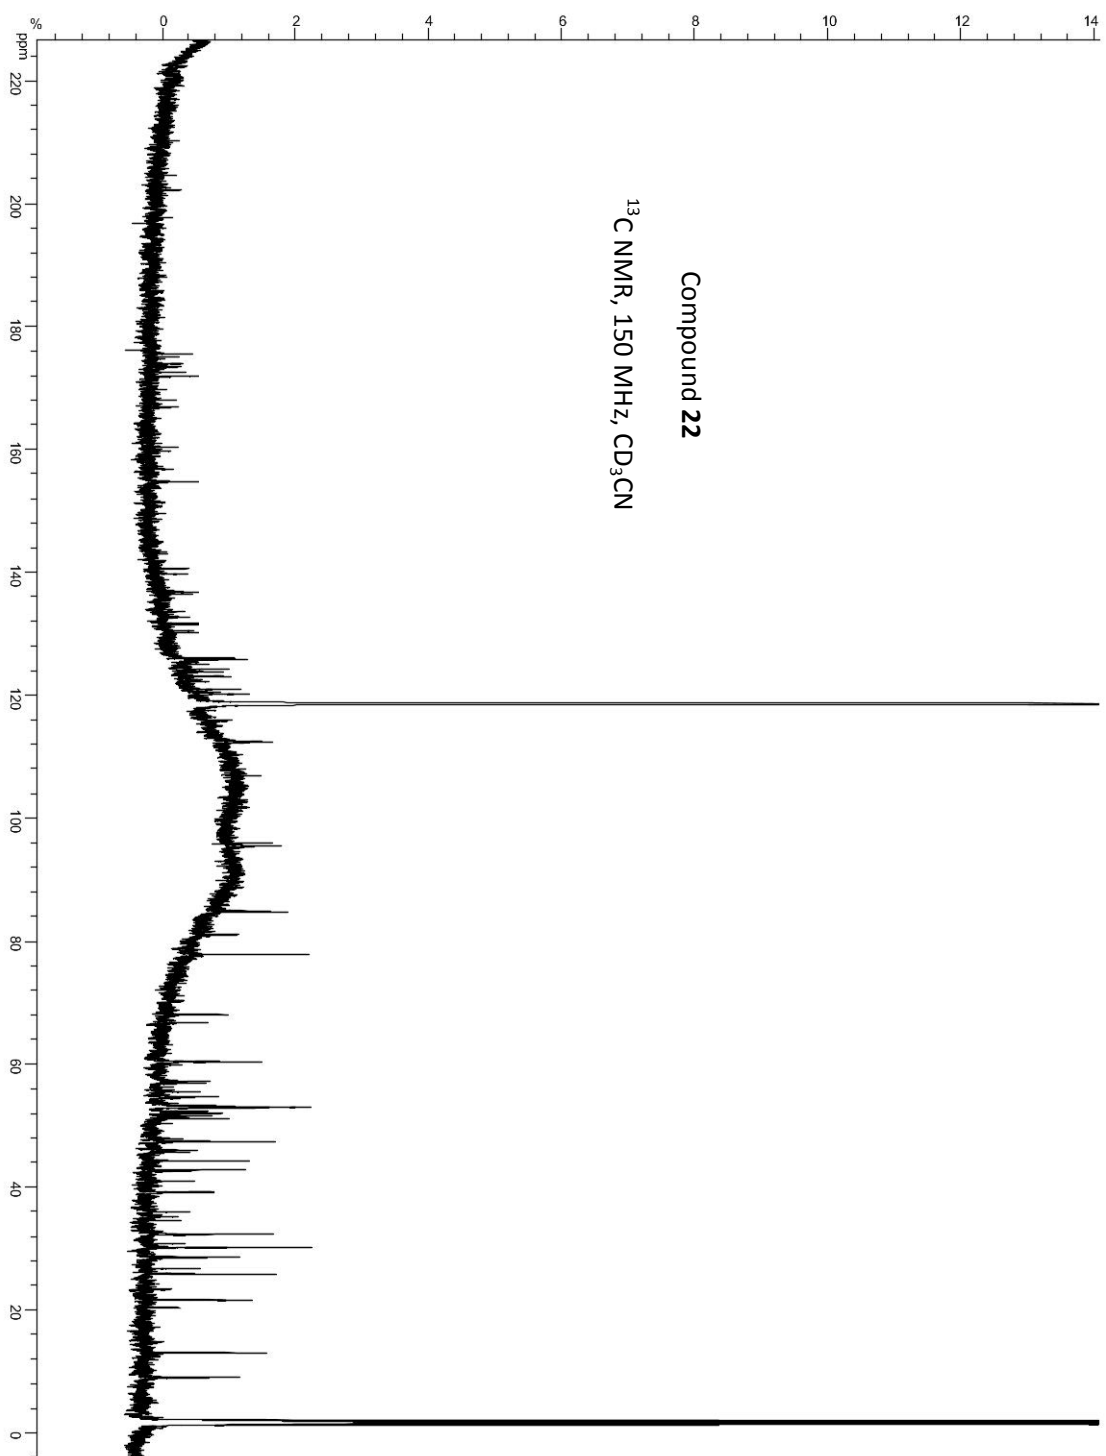

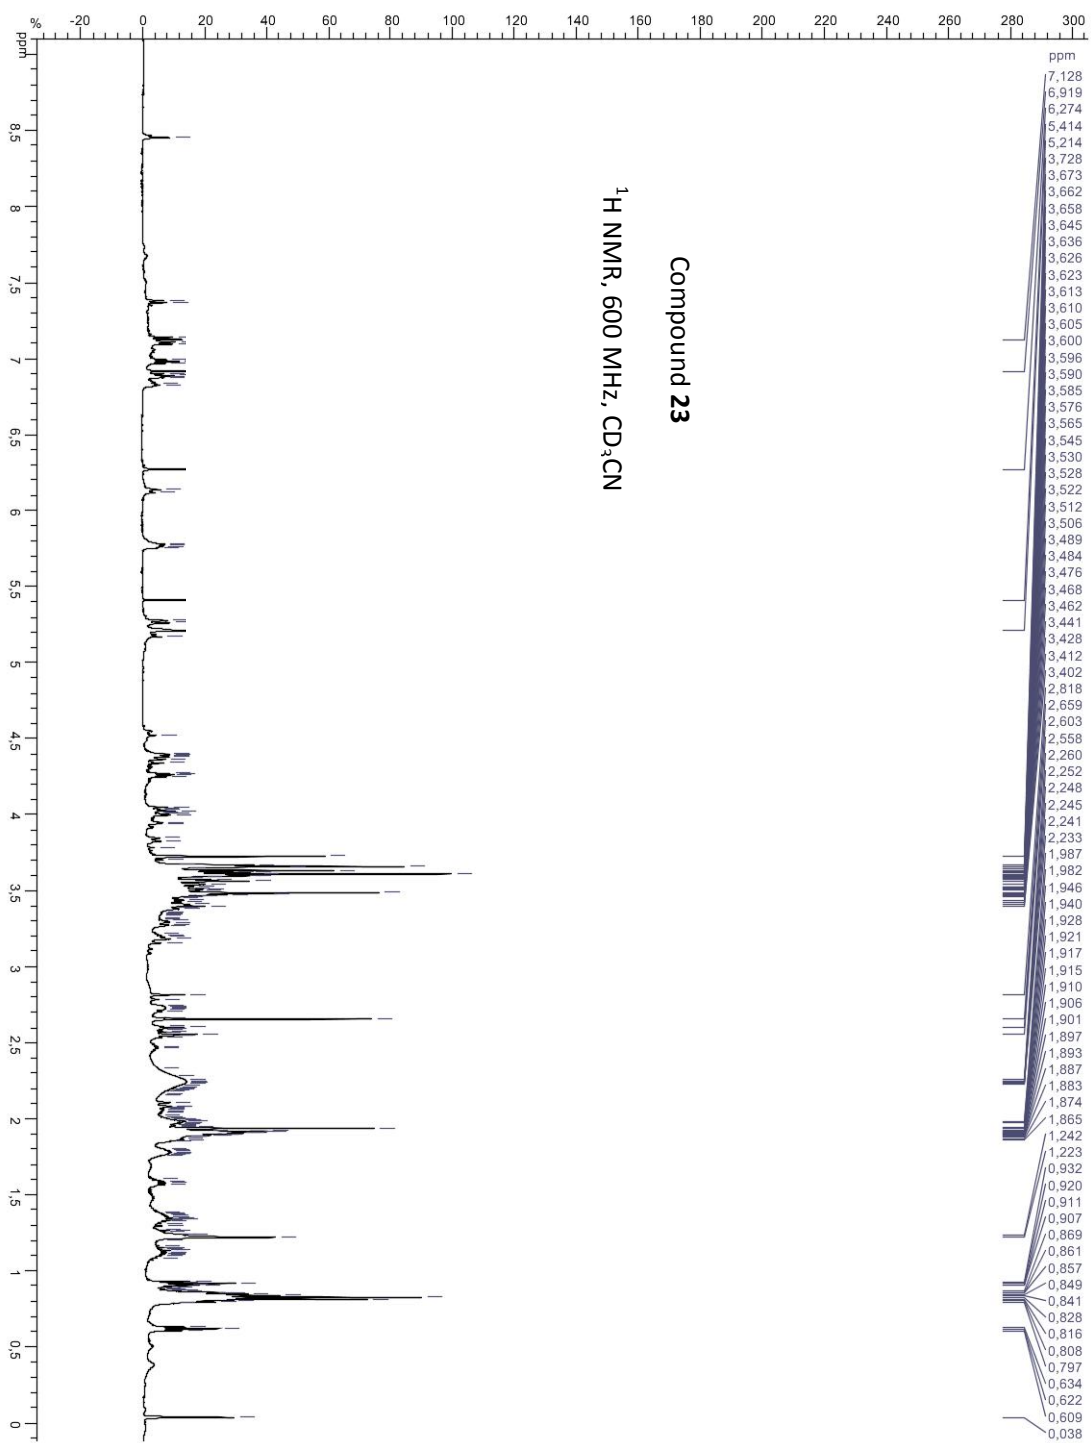

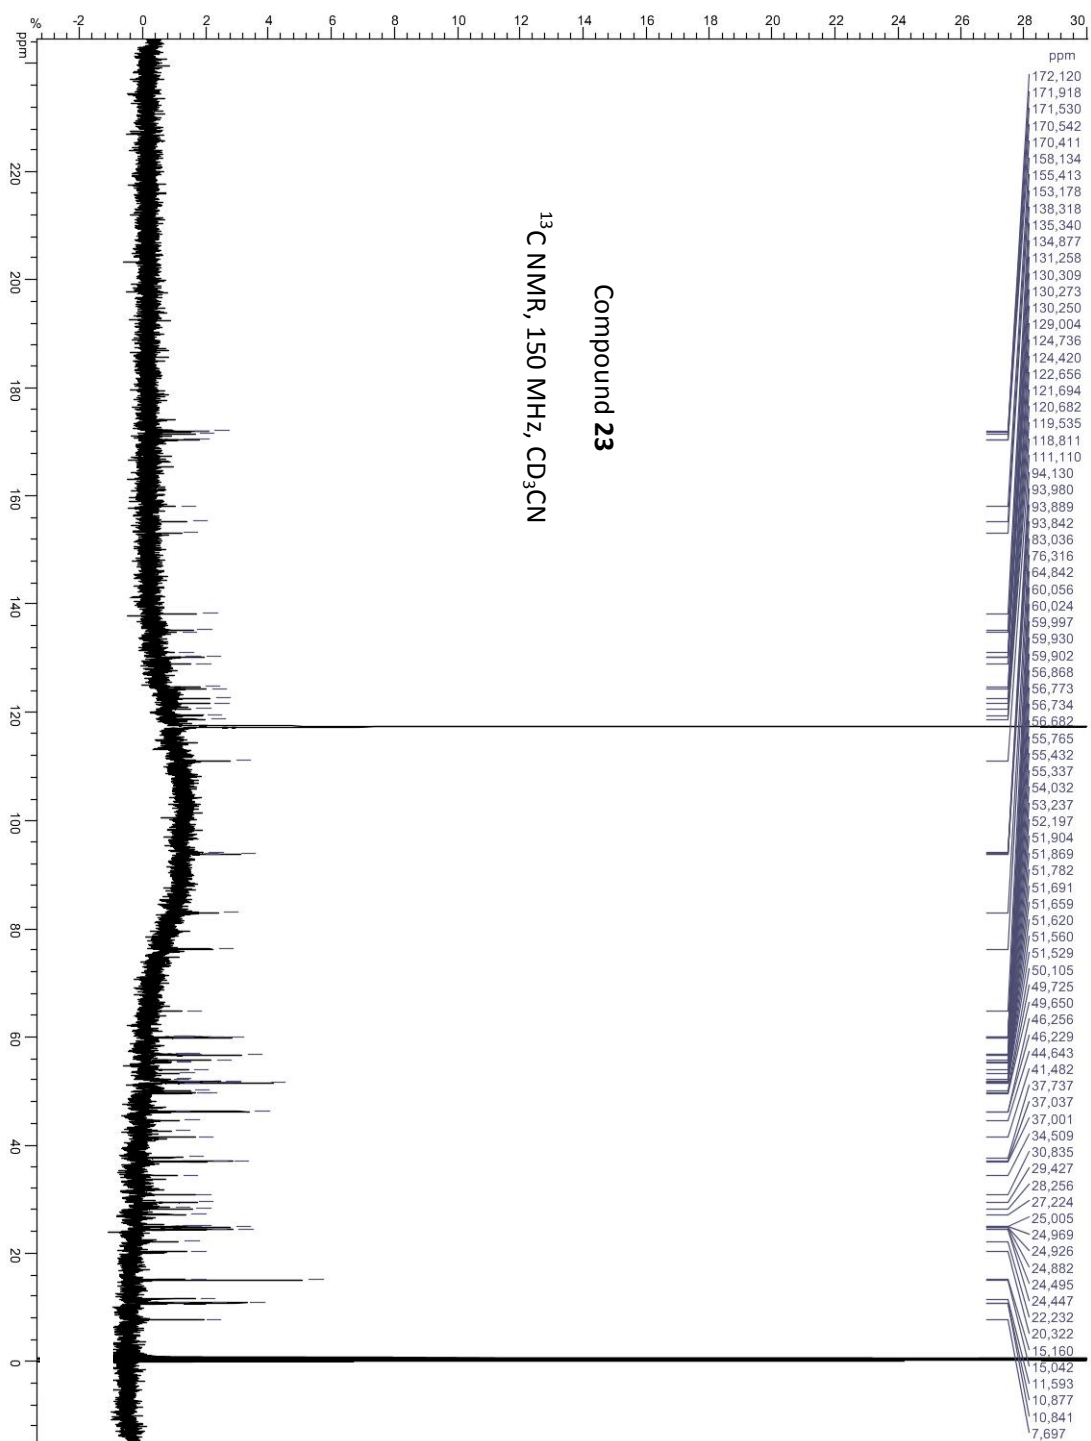

Compound **24**  
 $^1\text{H}$  NMR, 600 MHz,  $\text{CDCl}_3$

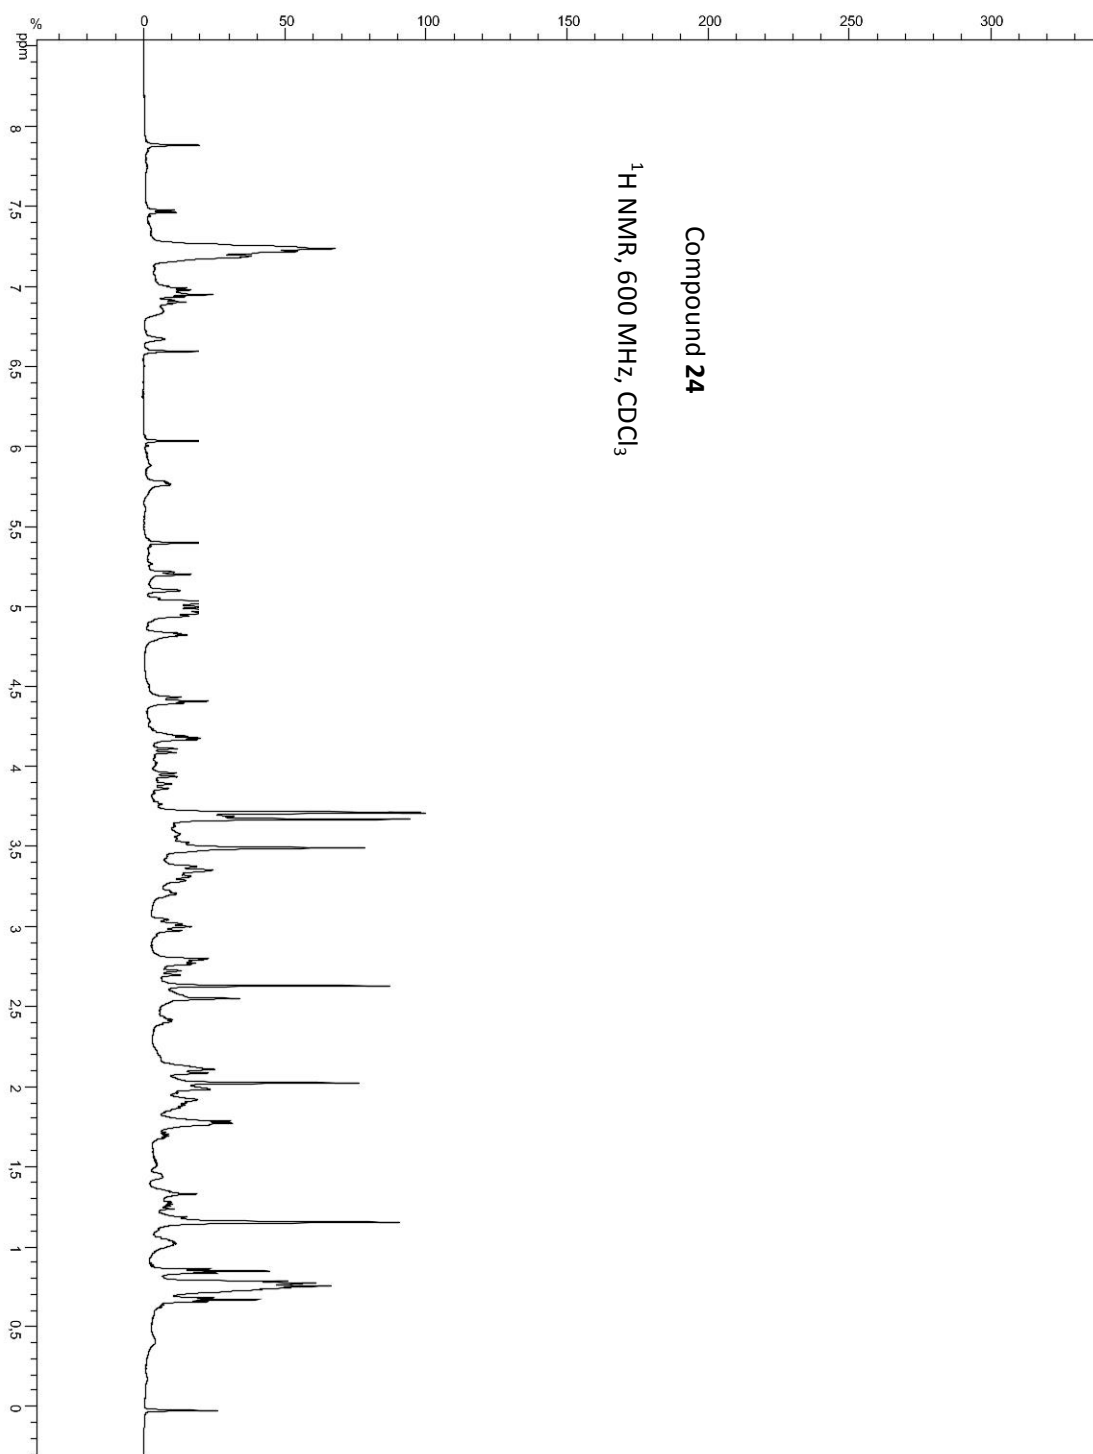



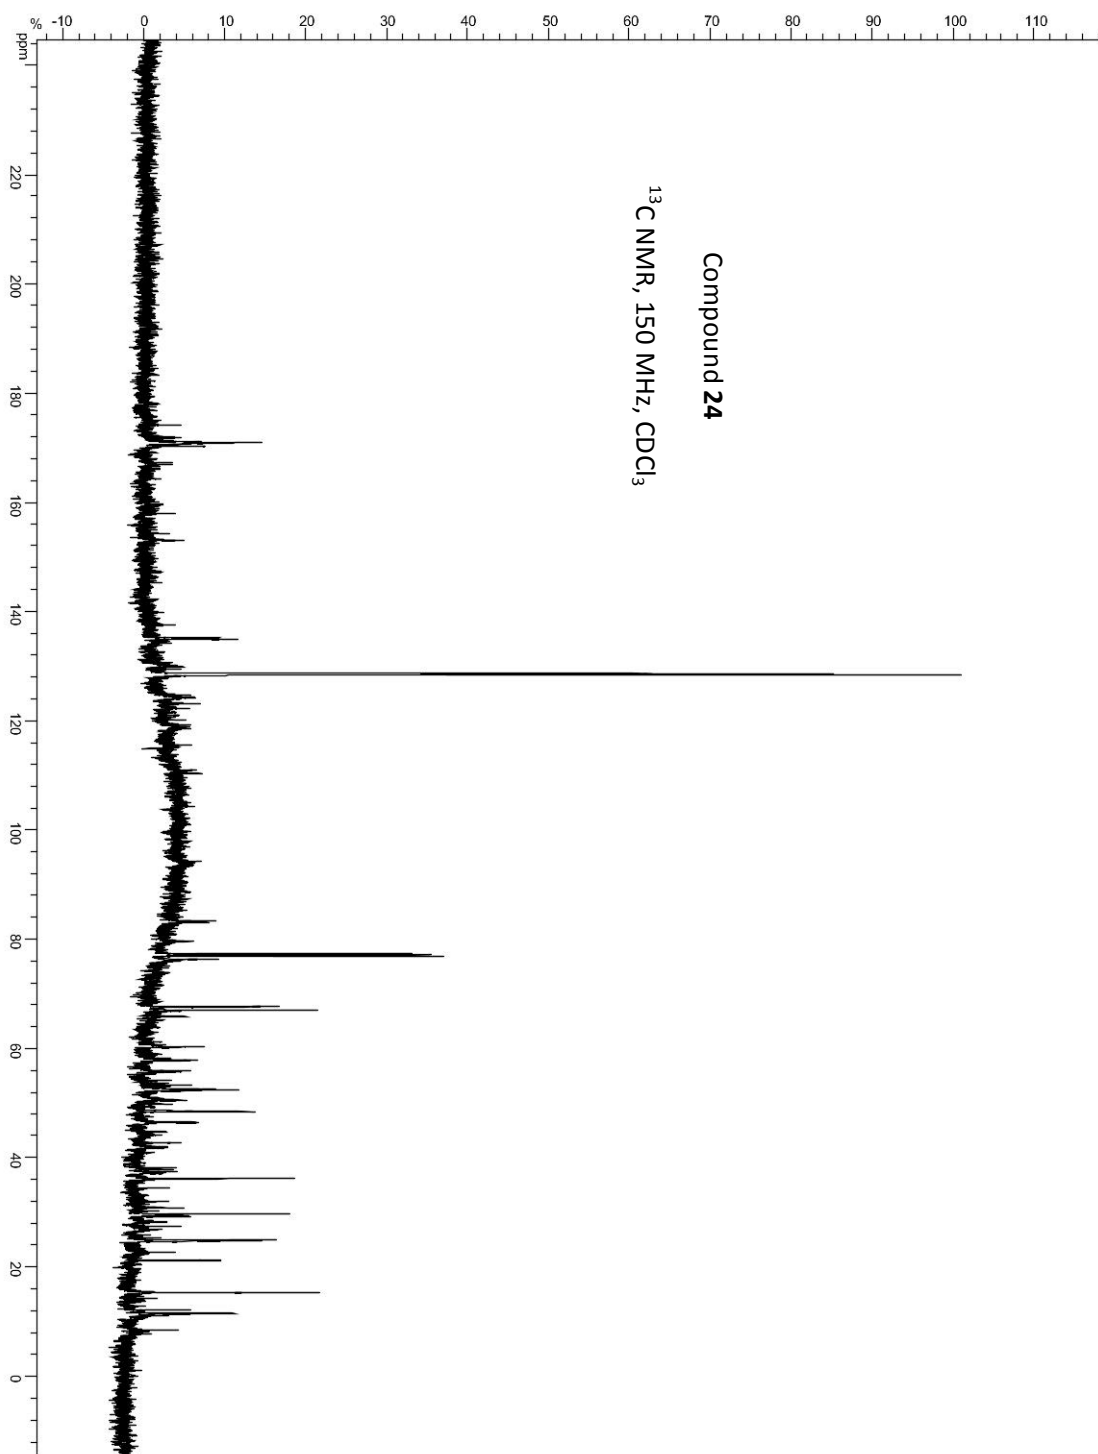

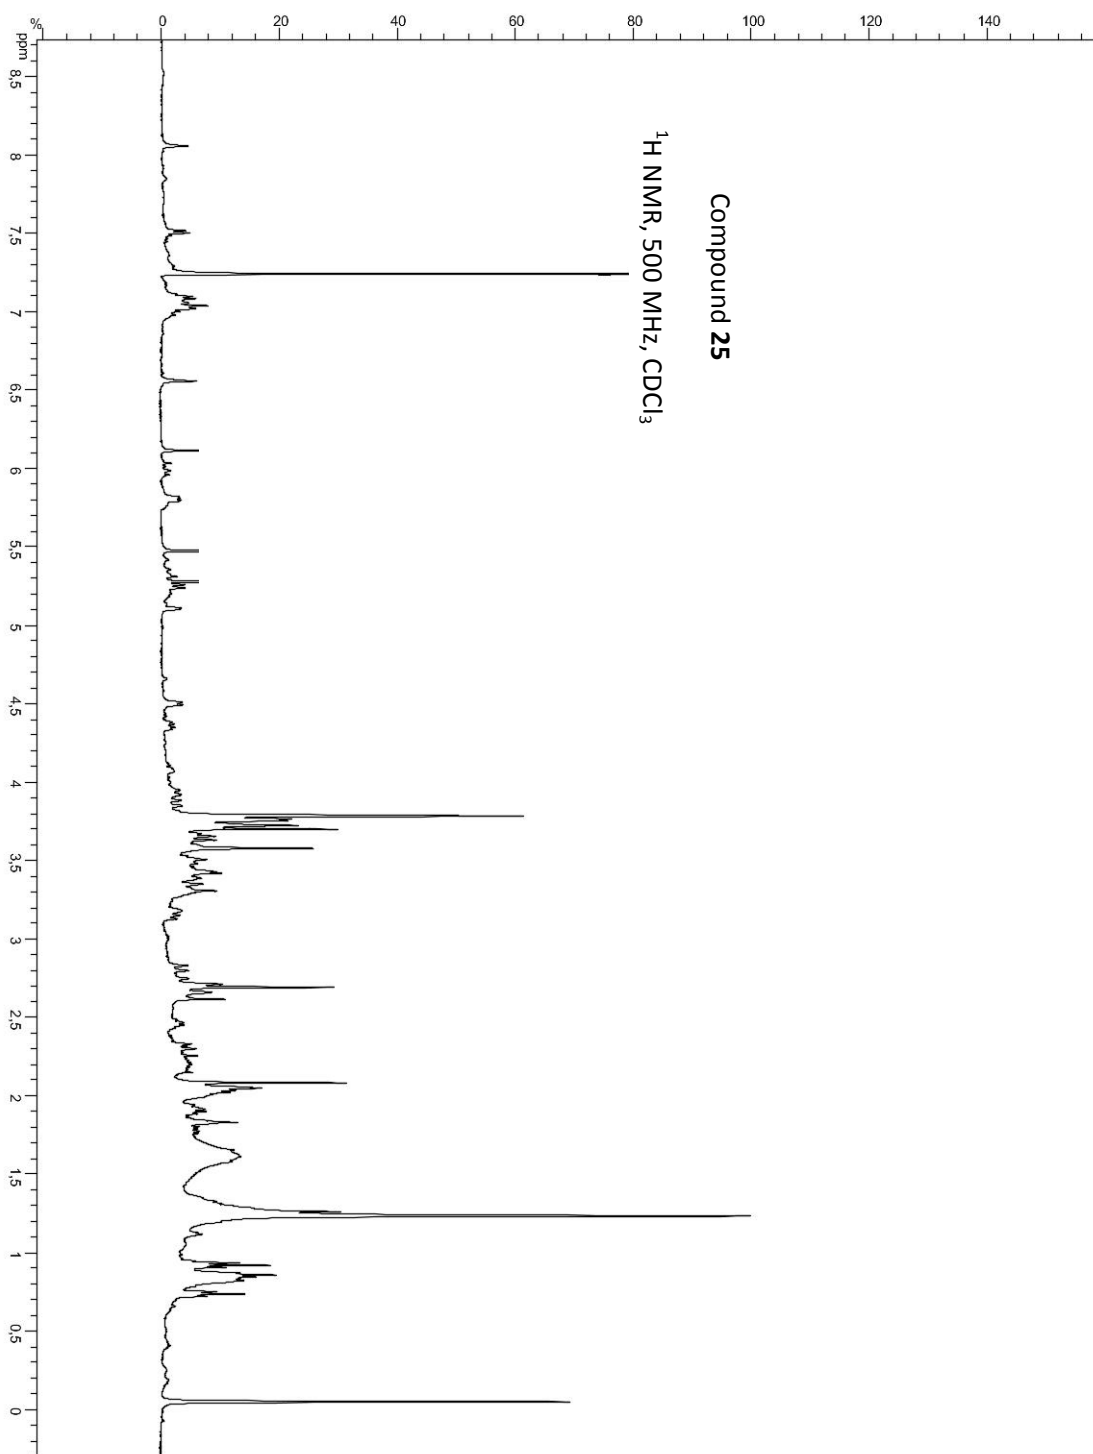

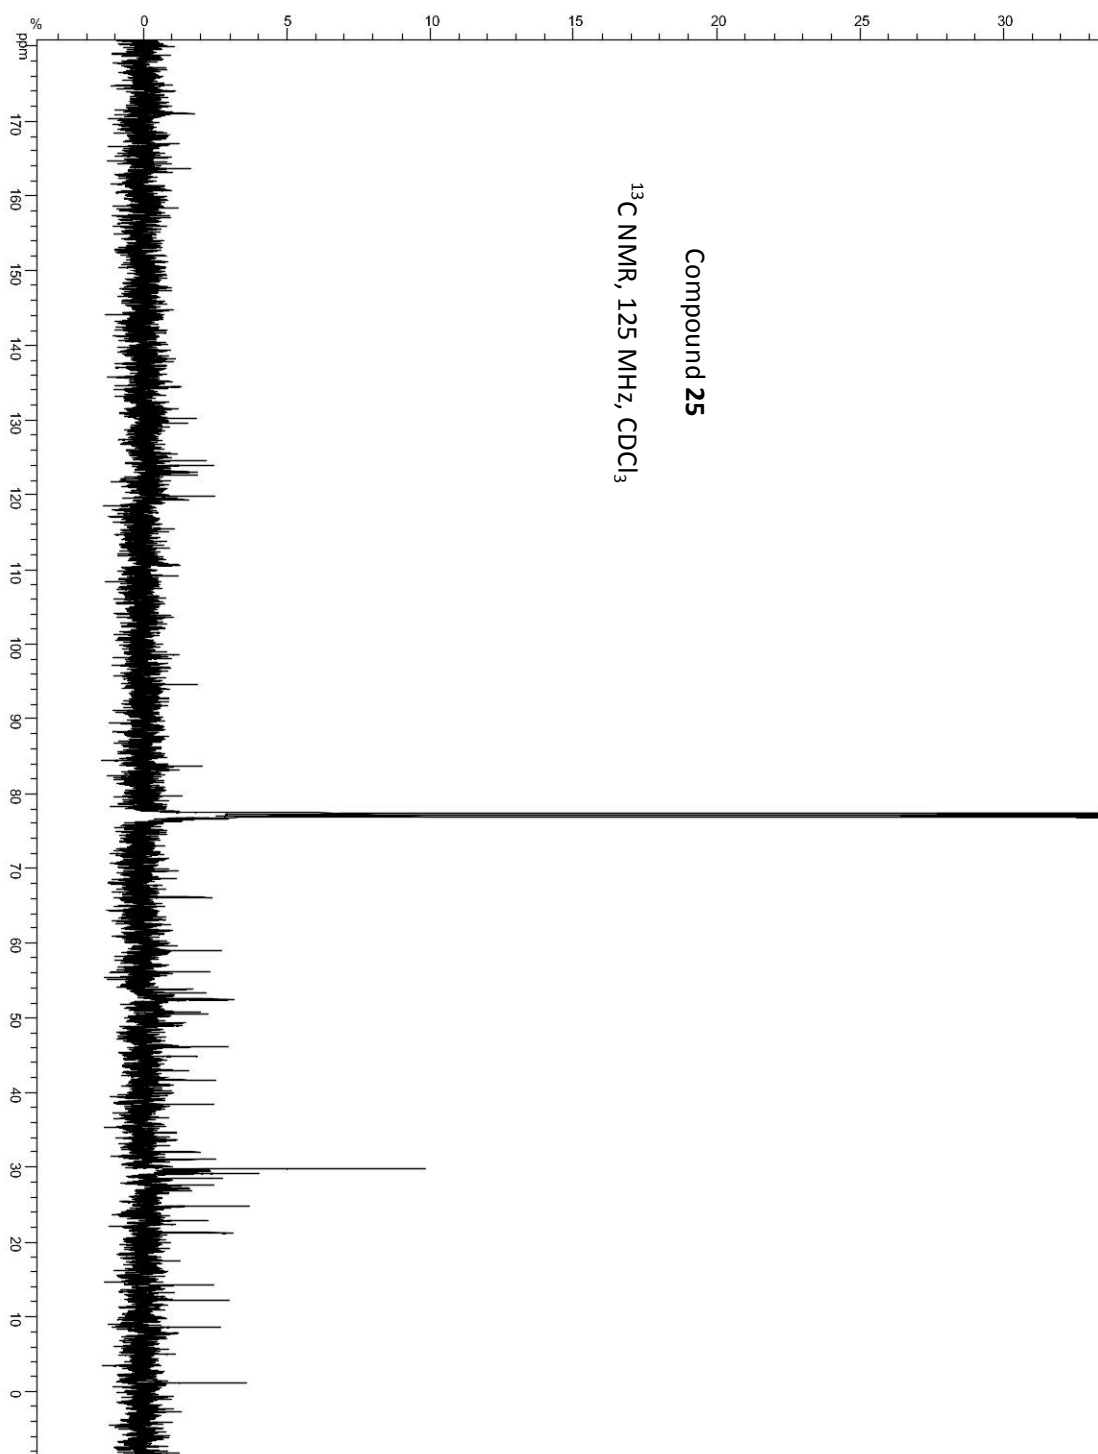



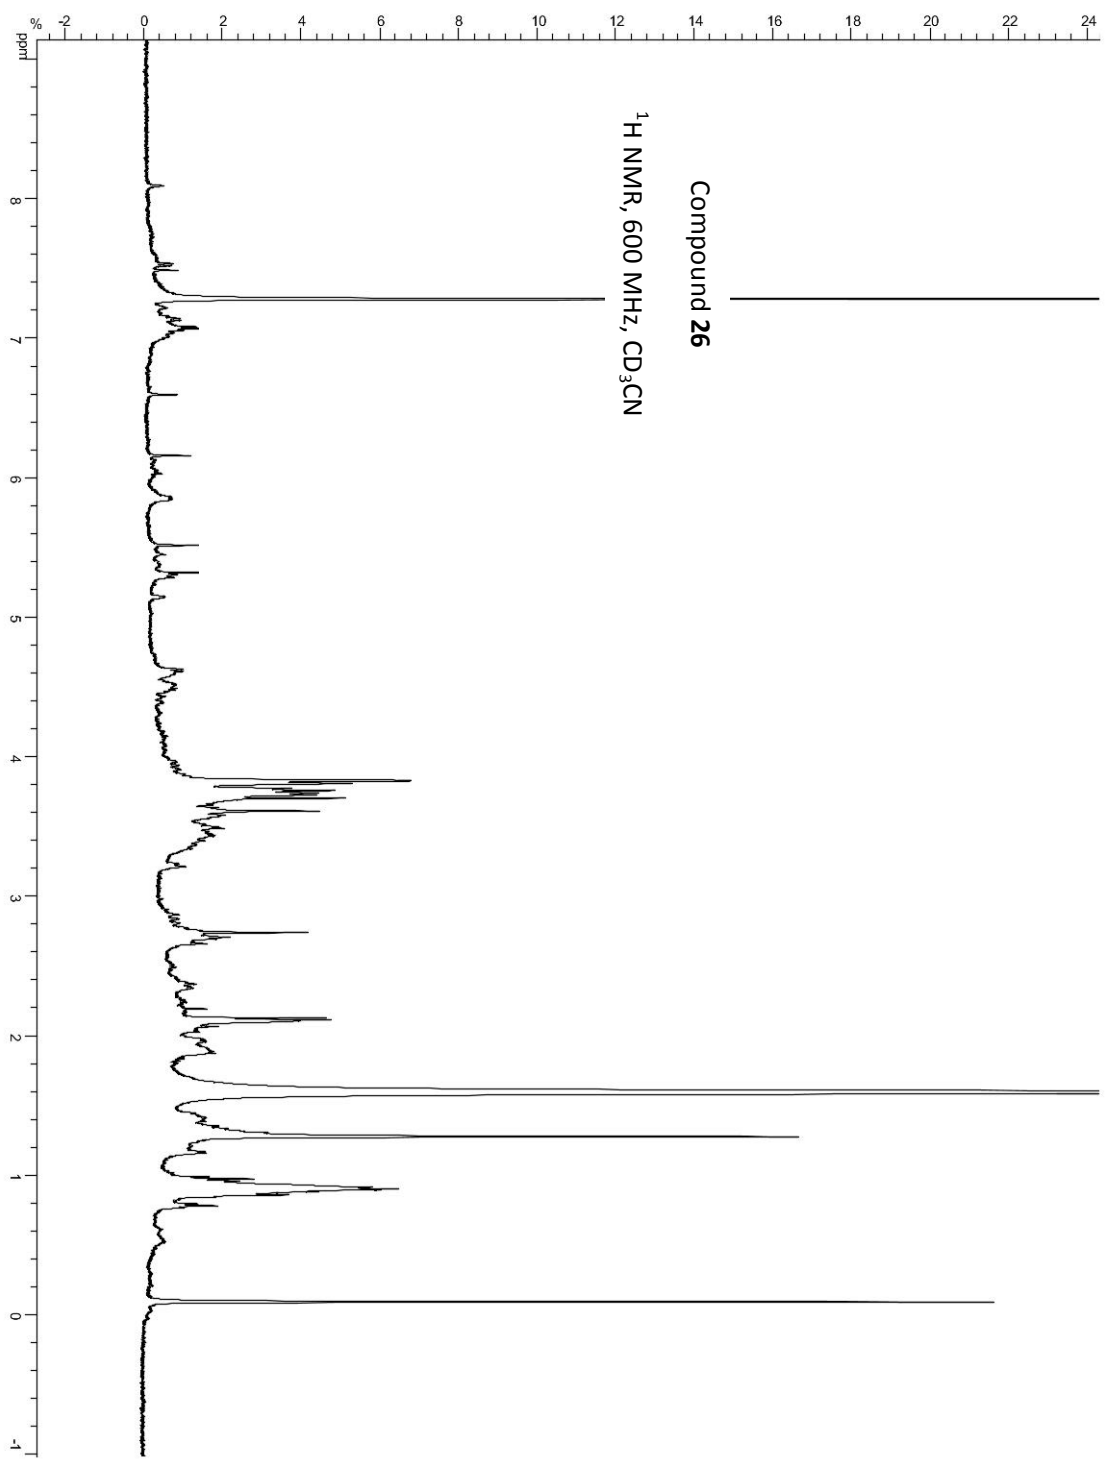

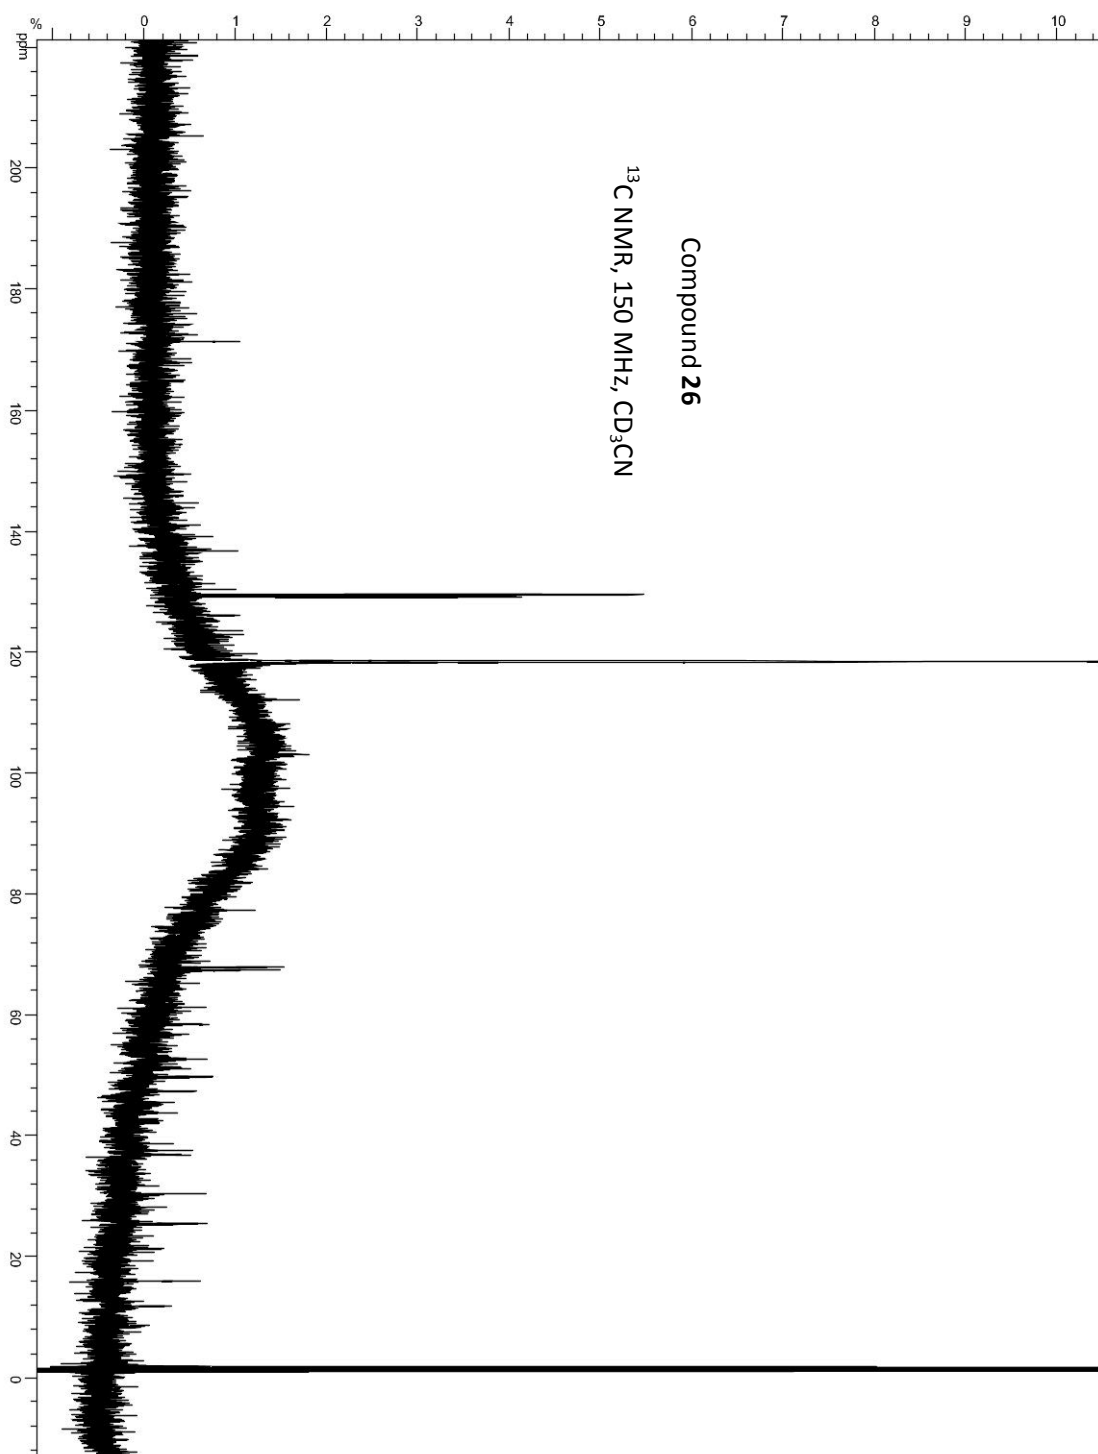

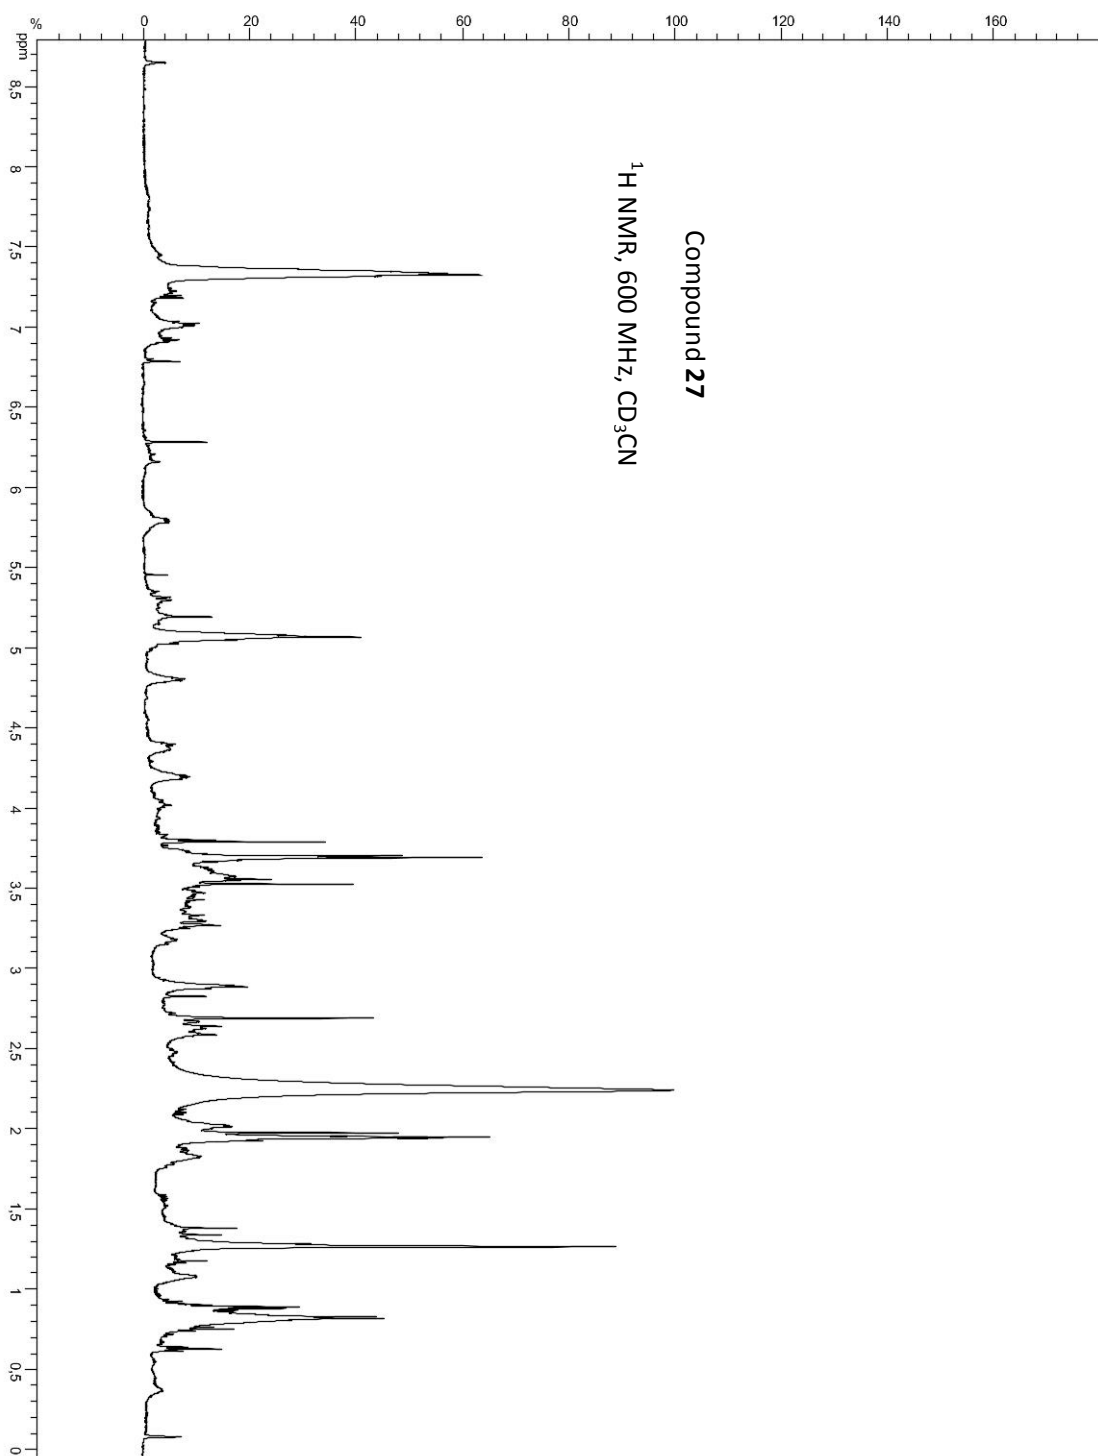

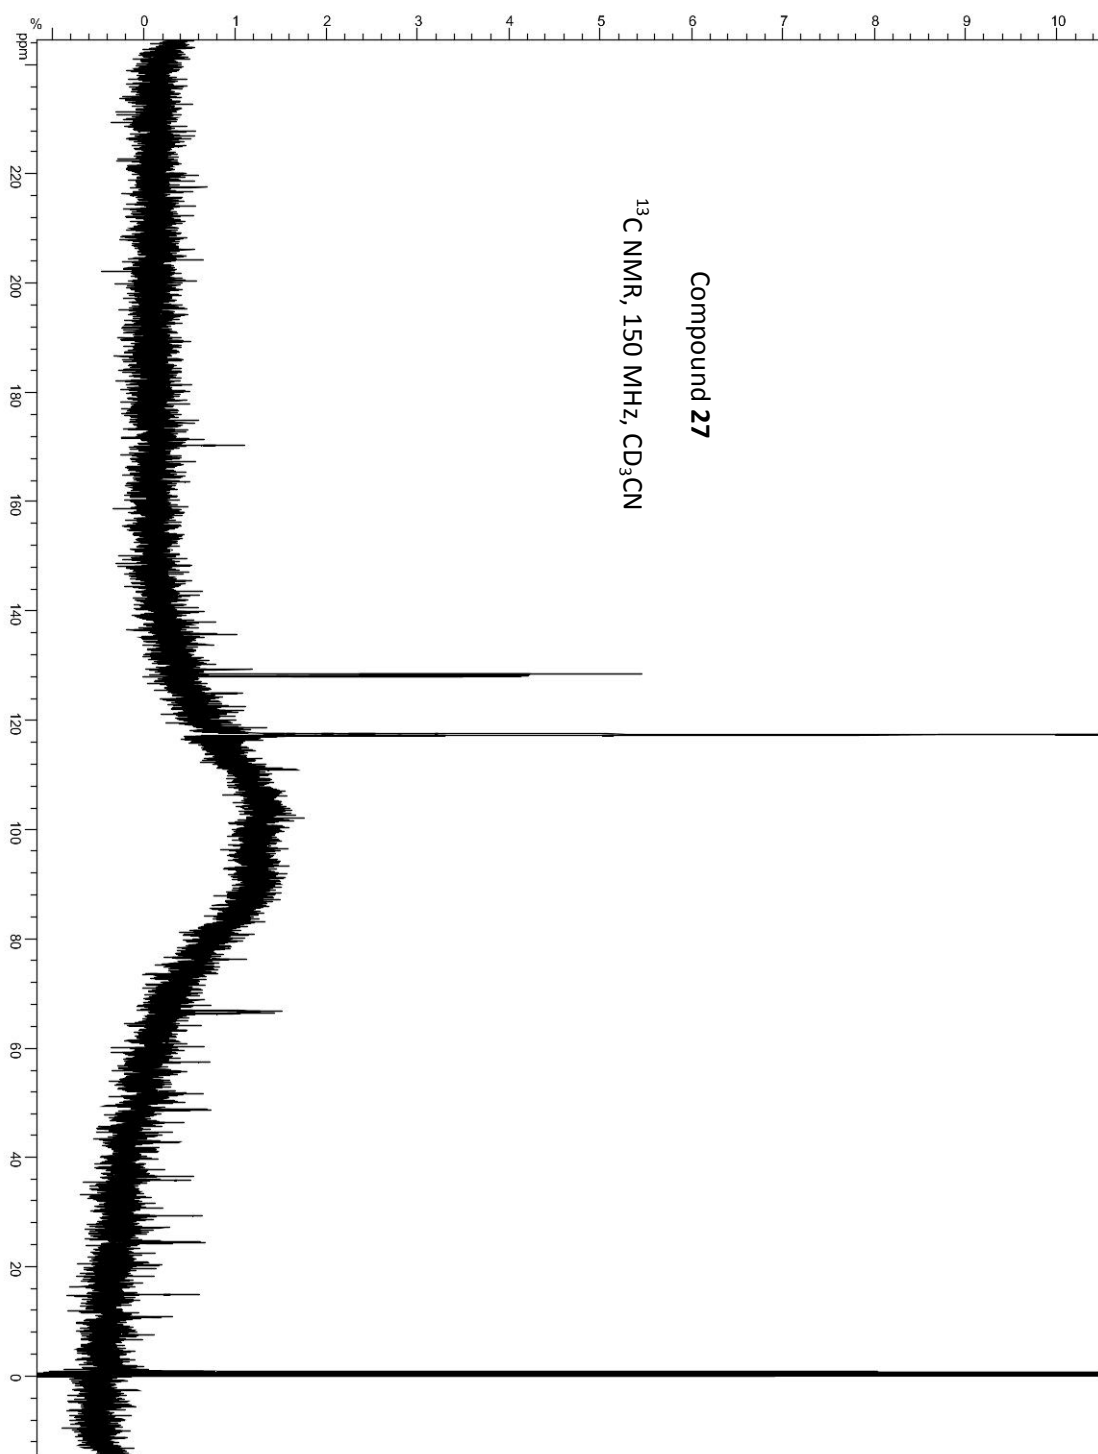







Supplement: c4ob02114b1.pdf [file c4ob02114b1.pdf]
